# Supplementary material for: The bacterial communities associated with fecal types and body weight of rex rabbits
Source: PubMed Central journal article supplement (PMC4366860; doi:10.1038/srep09342), 2015-03-20
Supplement: srep09342-s1.pdf [file srep09342-s1.pdf]

## **The bacterial communities associated with fecal types and body weight of rex rabbits**

Bo Zeng<sup>1#</sup>, Ping Wang<sup>2#</sup>, Shushu Han<sup>1#</sup>, Bin Wen<sup>2</sup>, Wensu Jian<sup>2</sup>, Wei Guo<sup>1</sup>, Zhiju Yu<sup>2</sup>, Dan Du<sup>2</sup>, Xiangchao Fu<sup>2</sup>, Fanli Kong<sup>1</sup>, Xiaohui Si<sup>1</sup>, Mingyao Yang<sup>1</sup>, Jiangchao Zhao<sup>3\*</sup> and Ying Li<sup>1\*</sup>

<sup>1</sup>Farm Animal Genetic Resources Exploration and Innovation Key Laboratory of Sichuan Province, Sichuan Agricultural University, Chengdu, Sichuan, China.

<sup>2</sup>Sichuan Academy of Grassland Science, Chengdu, Sichuan, China.

<sup>3</sup>Department of Pediatrics and Communicable Disease, University of Michigan, Ann Arbor, Michigan, United States of America.

Table S1 OTU table summary

| Rabbit ID | Sample Type | Weight group | Group   | Sample ID | Sequence counts | Observations (OTU number) |
|-----------|-------------|--------------|---------|-----------|-----------------|---------------------------|
| rex1      | hard        | HW           | HW_hard | 1         | 56878           | 6926                      |
| rex5      | hard        | HW           | HW_hard | 2         | 55695           | 6546                      |
| rex3      | hard        | HW           | HW_hard | 3         | 23511           | 3912                      |
| rex2      | hard        | HW           | HW_hard | 4         | 33591           | 4504                      |
| rex6      | hard        | HW           | HW_hard | 5         | 62241           | 8046                      |
| rex10     | hard        | HW           | HW_hard | 6         | 74060           | 6930                      |
| rex4      | hard        | HW           | HW_hard | 7         | 54363           | 5517                      |
| rex8      | hard        | HW           | HW_hard | 8         | 58505           | 7604                      |
| rex18     | hard        | HW           | HW_hard | 9         | 77263           | 10103                     |
| rex9      | hard        | HW           | HW_hard | 10        | 49087           | 5745                      |
| rex28     | hard        | LW           | LW_hard | 11        | 56015           | 8075                      |
| rex37     | hard        | LW           | LW_hard | 12        | 34108           | 6599                      |
| rex35     | hard        | LW           | LW_hard | 13        | 48055           | 7338                      |
| rex36     | hard        | LW           | LW_hard | 14        | 51203           | 7835                      |
| rex24     | hard        | LW           | LW_hard | 15        | 48992           | 6895                      |
| rex31     | hard        | LW           | LW_hard | 16        | 35424           | 5278                      |
| rex25     | hard        | LW           | LW_hard | 17        | 43715           | 6839                      |
| rex38     | hard        | LW           | LW_hard | 18        | 57028           | 8738                      |
| rex32     | hard        | LW           | LW_hard | 19        | 44097           | 7094                      |
| rex40     | hard        | LW           | LW_hard | 20        | 46874           | 5586                      |
| rex1      | soft        | HW           | HW_soft | 21        | 53227           | 6919                      |
| rex5      | soft        | HW           | HW_soft | 22        | 76097           | 9280                      |
| rex3      | soft        | HW           | HW_soft | 23        | 56971           | 6908                      |
| rex2      | soft        | HW           | HW_soft | 24        | 58363           | 7710                      |
| rex6      | soft        | HW           | HW_soft | 25        | 60419           | 9490                      |
| rex10     | soft        | HW           | HW_soft | 26        | 47759           | 6102                      |
| rex4      | soft        | HW           | HW_soft | 27        | 33243           | 4634                      |
| rex8      | soft        | HW           | HW_soft | 28        | 44660           | 6399                      |
| rex18     | soft        | HW           | HW_soft | 29        | 61449           | 7871                      |
| rex9      | soft        | HW           | HW_soft | 30        | 66317           | 7966                      |
| rex28     | soft        | LW           | LW_soft | 31        | 48294           | 6196                      |
| rex37     | soft        | LW           | LW_soft | 32        | 44525           | 6201                      |
| rex35     | soft        | LW           | LW_soft | 33        | 55451           | 7864                      |

---

|       |      |    |         |    |       |      |
|-------|------|----|---------|----|-------|------|
| rex36 | soft | LW | LW_soft | 34 | 30663 | 4864 |
| rex24 | soft | LW | LW_soft | 35 | 50634 | 6907 |
| rex31 | soft | LW | LW_soft | 36 | 57090 | 5859 |
| rex25 | soft | LW | LW_soft | 37 | 60926 | 6922 |
| rex38 | soft | LW | LW_soft | 38 | 54996 | 9074 |
| rex32 | soft | LW | LW_soft | 39 | 64424 | 7359 |
| rex40 | soft | LW | LW_soft | 40 | 42608 | 5561 |

---

Figure S1

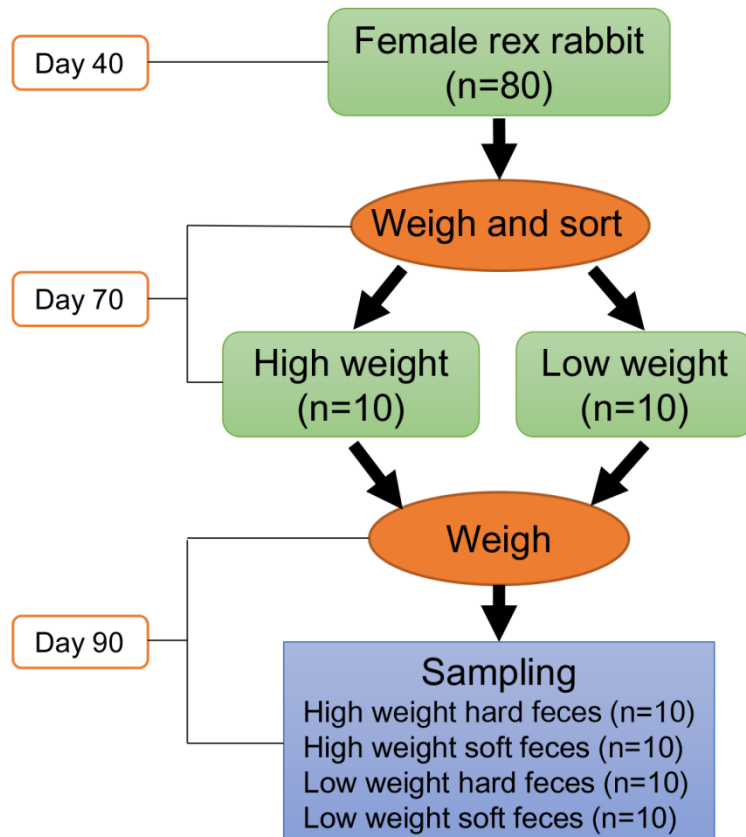

Figure S1. Flowchart of the experiment including rabbit grouping and sampling.

Figure S2

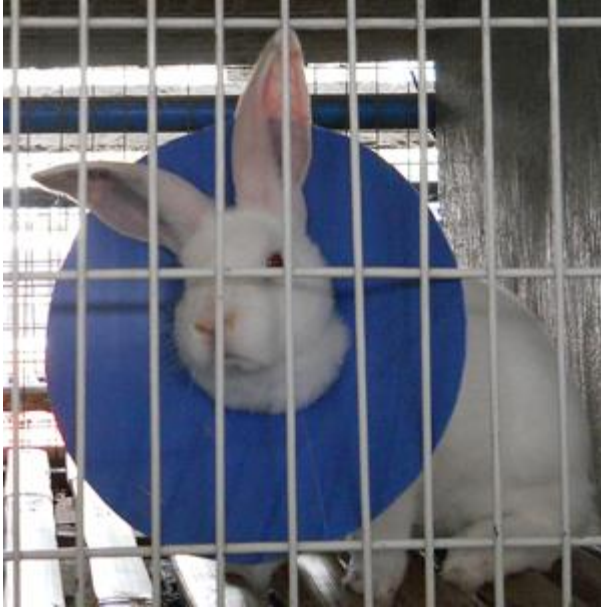

Figure S2. Caecotrophy prevention (CP) circle used to prevent the rabbits from eating their soft feces during sampling. The CP circle is a blue, plate shaped neck collar made with 1 mm thick PP plastic. With its moderate rigidity and angularity, it can only prevent the rabbit from eating their own soft feces, without disturbing normal food ingestion, drinking, moving or sleeping in cages. Photo was taken by B.Z.

Figure S3

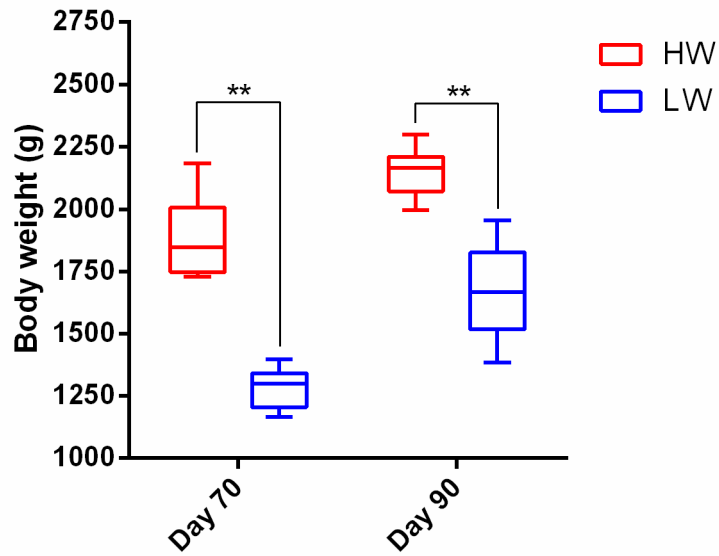

Figure S3. Comparison of body weight between rabbit groups. HW: High weight group (n=10). LW: Low weight group (n=10). Asterisk represents the significance test (\*\* $p < 0.01$ , One-sided Student's t-test).

Figure S4

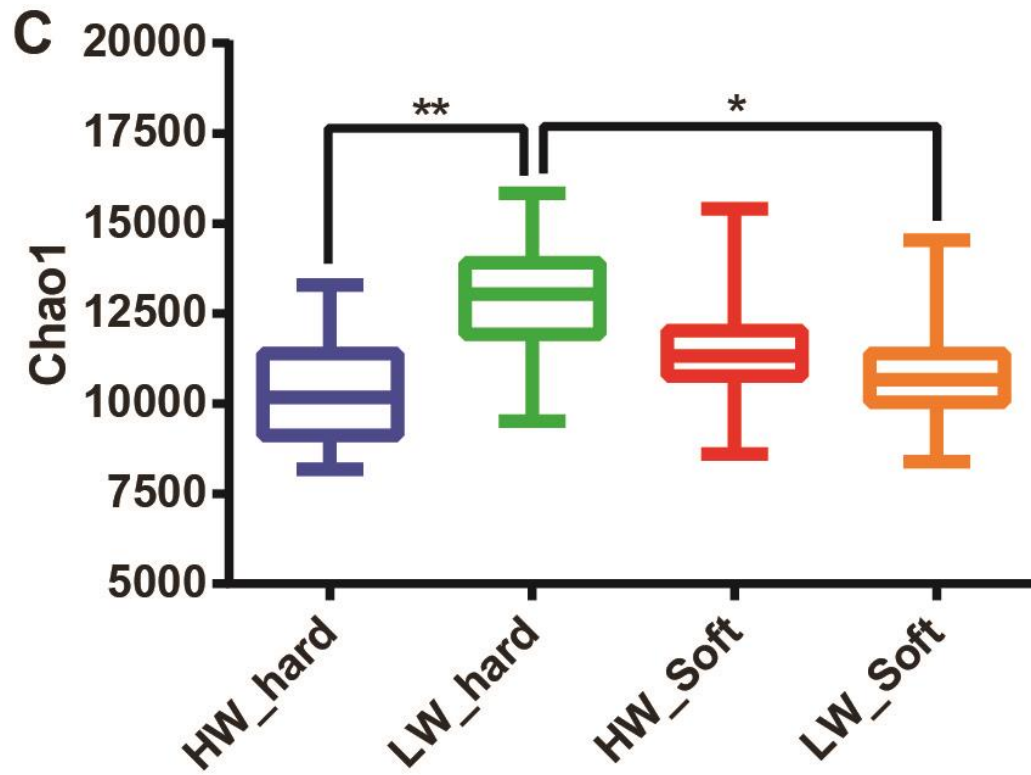

Figure S4. Differences in bacterial community richness (Chao1) between the four groups. Asterisk shows significant differences between groups (\*\*  $p < 0.01$ , \*  $p < 0.05$ , Mann-Whitney U test).

Figure S5

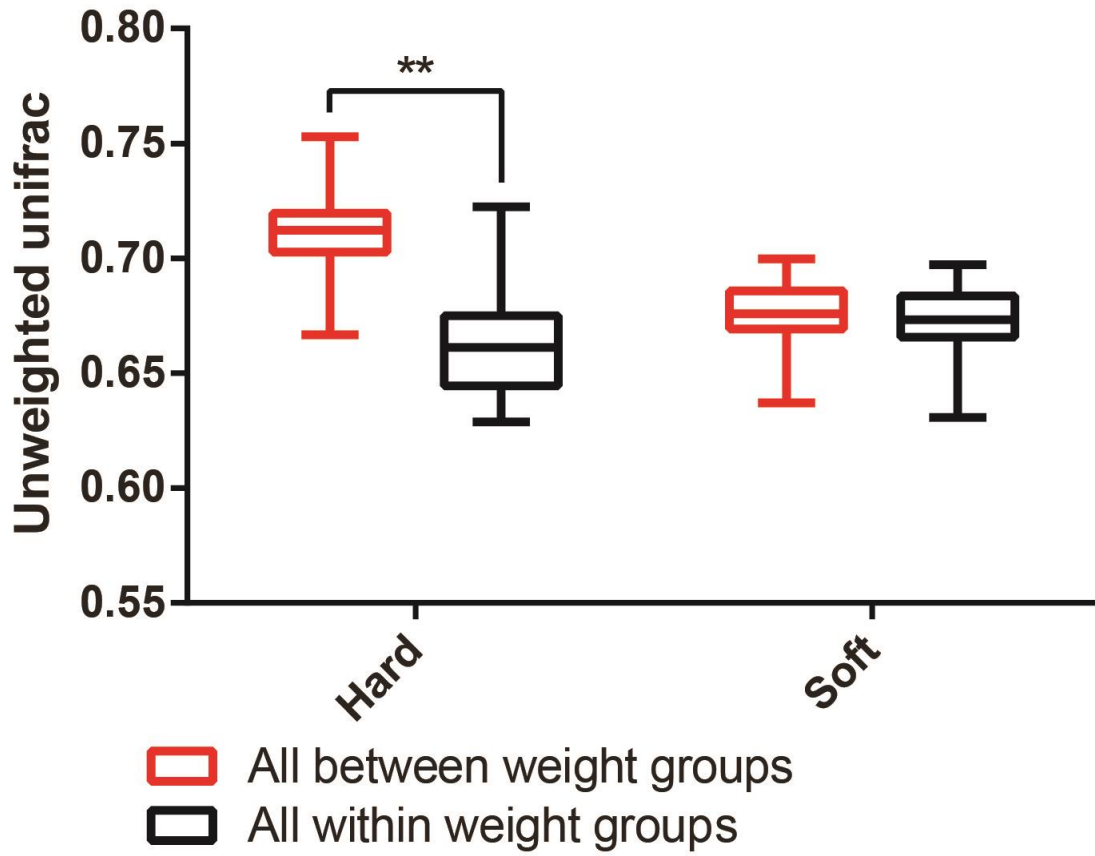

Figure S5. Comparison of the unweighted Unifrac distances between high and low weight groups in hard and soft feces (\*\*  $p < 0.01$ , two-sided Student's two-sample t-test).
